# Supplementary material for: Modulation of Virulence-Associated Traits in Aspergillus fumigatus by BET Inhibitor JQ1
Source: MDPI journal article supplement (doi:10.3390/microorganisms10112292), 2022-11-18
Supplement: s1 [file s1]

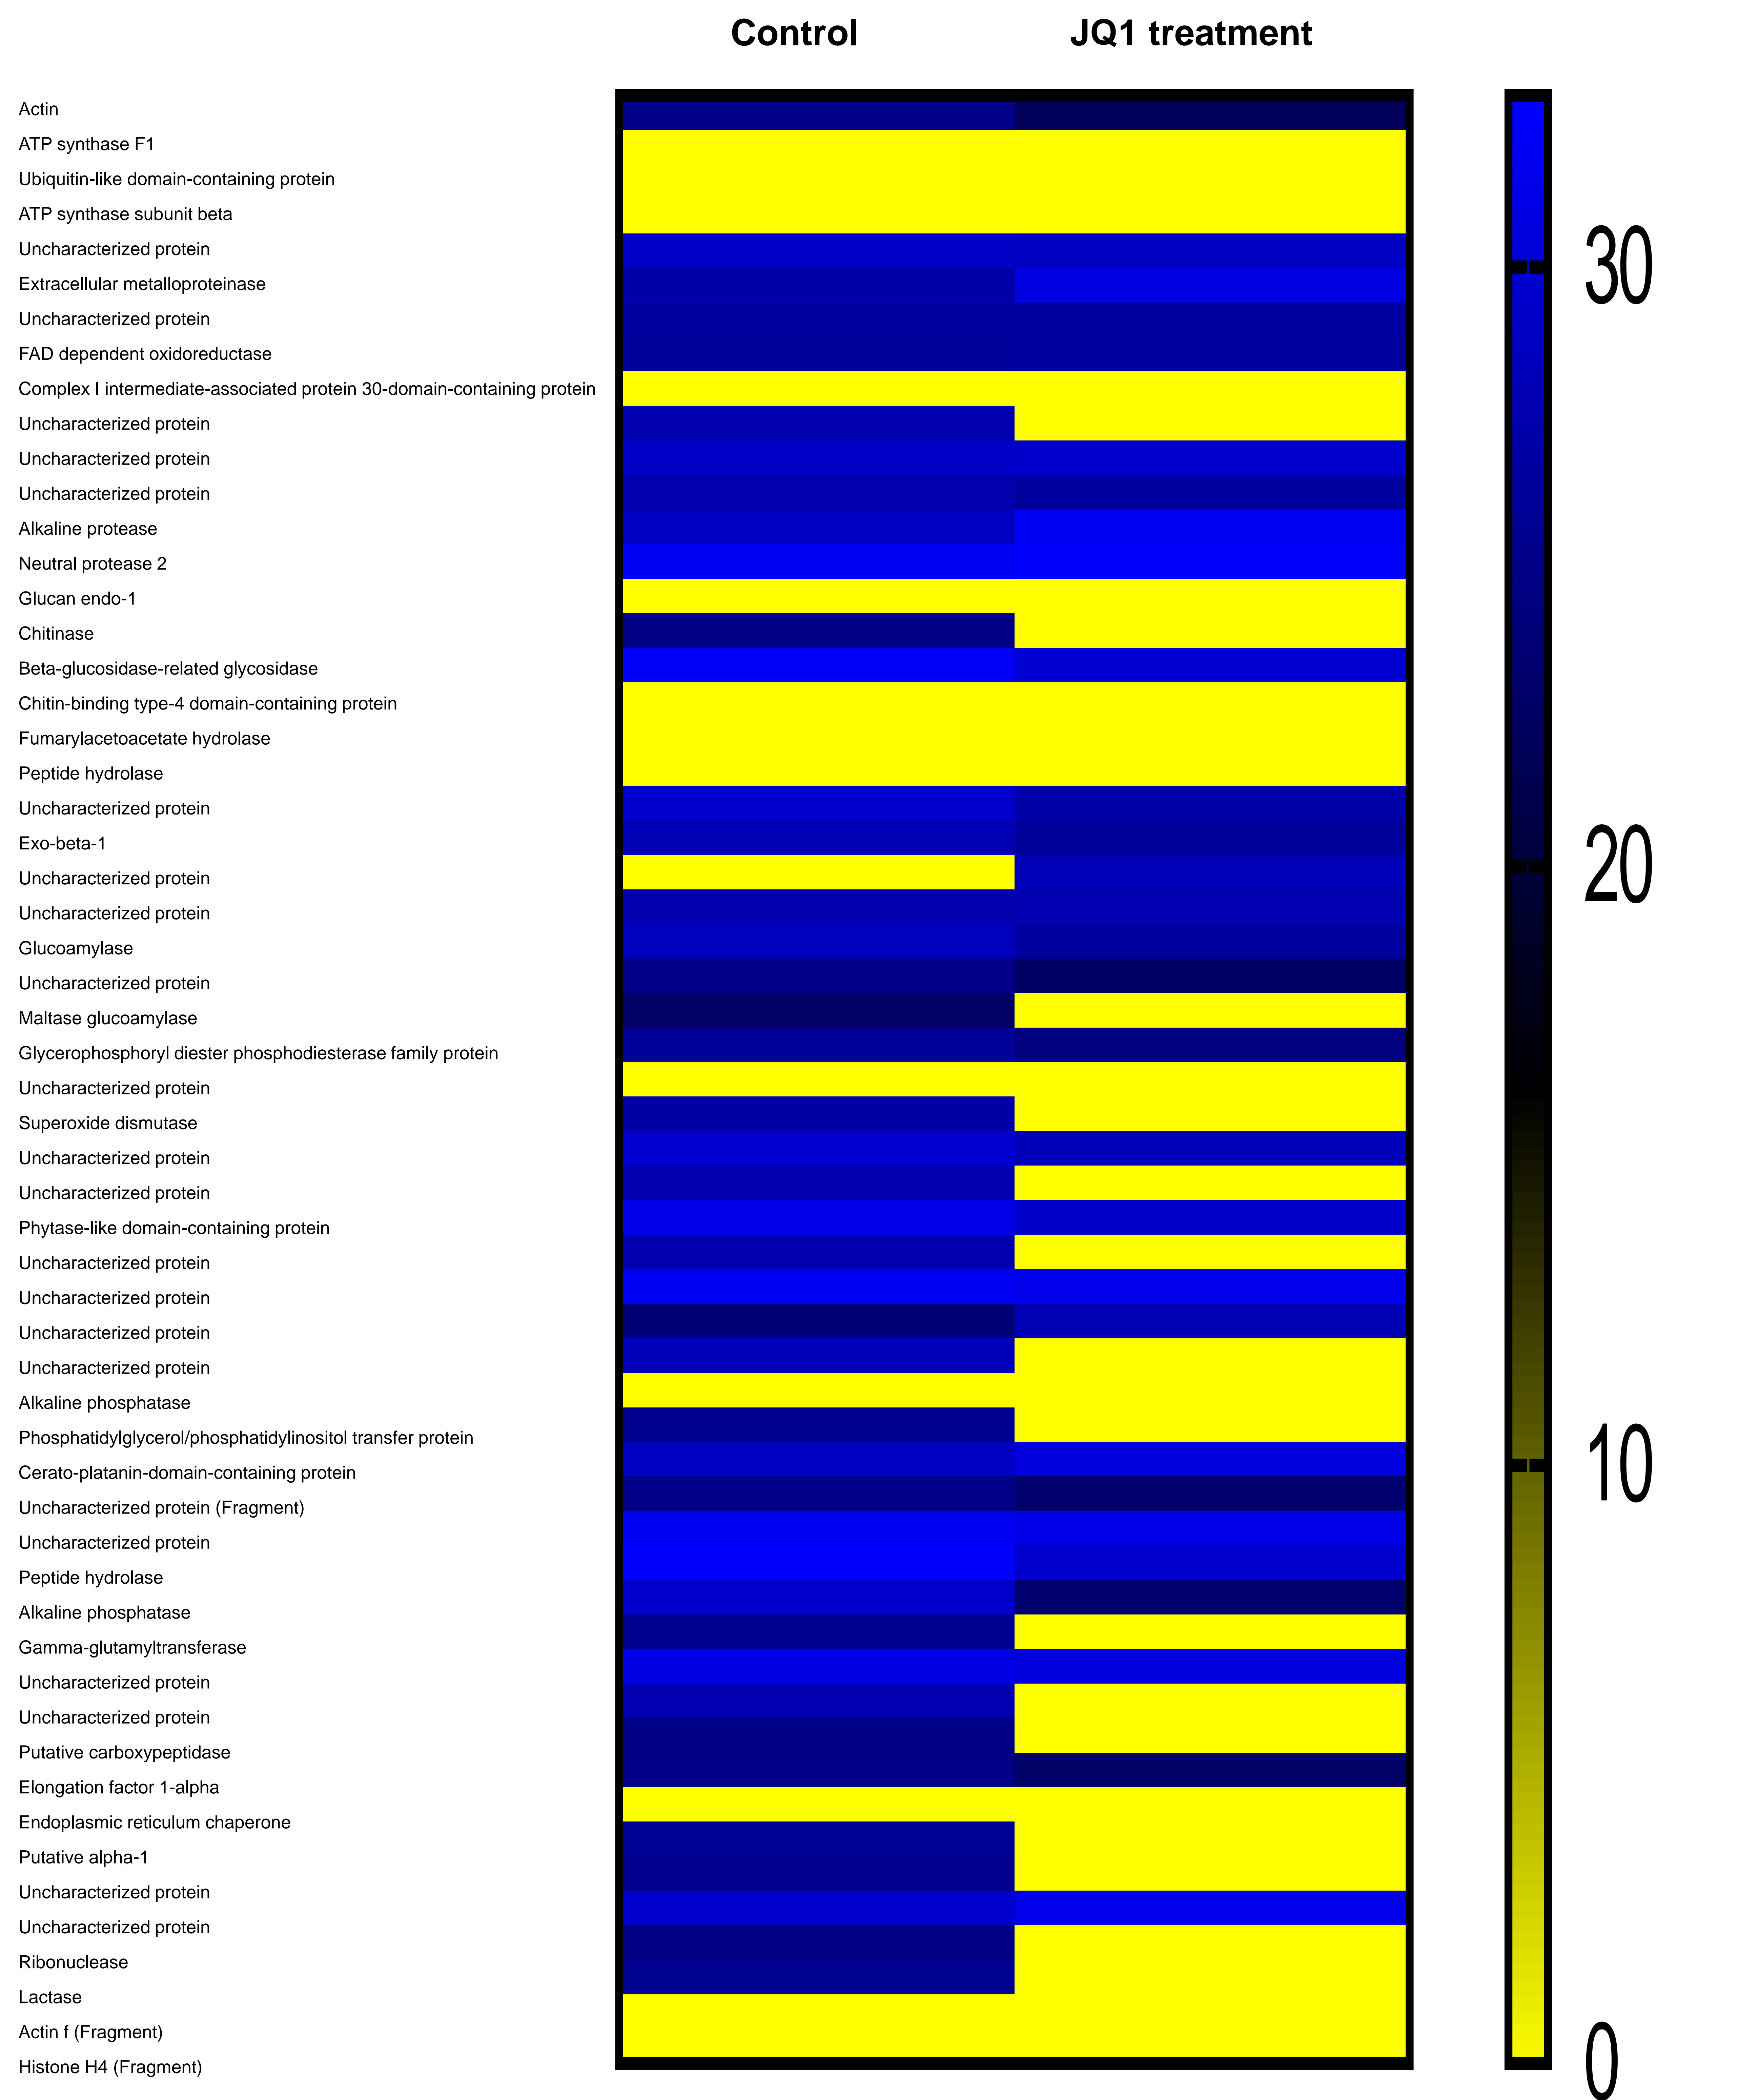

**Supplementary S1.** LC-MS/MS results of proteins secreted by *A. fumigatus* DSM 790 after or not after JQ1 treatment. Overall data of LC-MS/MS analysis after treatment of *A. fumigatus* with or without JQ1. Log 2 (LFQ intensity) of the extracellular proteins. The value is expressed as media of at least three independent biological replicates.
